# Supplementary material for: Epidemiology, pathogens distribution, antibiotic susceptibility and the risk factors for mortality of patients with central nervous system infections: a retrospective study from 2012 to 2019 in a teaching hospital in China
Source: Research Square preprint supplement (doi:10.21203/rs.3.rs-153262/v2), 2021-03-15
Supplement: Supplementary file 1 [file 84cbf4216b8944bc77708ec3.xlsx]

## Sheet: Sheet1
Line 194, Page 9
Table 5. Comparison of demographic and clinical characteristics between two groups
Characteristics	Total (N=72)	Survivors (N=50)	Non-Survivors (N=22)	P
Age (years)	49.7±18.3	45.5±17.8	59.0±16.3	0.003
Age >50	41	23	18	0.005
Sex				0.375
Male	54 (75.0)	36 (72.0)	18 (81.8)
Female	18 (25.0)	14 (28.0)	4 (18.2)
Days in hospital	29.5 (19.3-46.0)	29.0 (20.7-45.0)	33.5 (18.0-51.0)	0.633
Comorbidity
Pulmonary infection	35 (48.6)	15 (30.0)	20 (90.9)	＜0.001
Hypertension	29 (40.3)	16 (32.0)	13 (59.1)	0.031
Hydrocephalus	26 (36.1)	16 (32.0)	10 (45.5)	0.274
Intracranial hemorrhage	19 (26.4)	13 (26.0)	6 (27.3)	0.91
Diabetes	10 (13.9)	5 (10.0)	5 (22.7)	0.285
MDR bacteria infection	49 (68.1)	31 (62.0)	18 (81.8)	0.097
Glucocorticoid therapy >3days	29 (40.3)	18 (36.0)	11 (50.0)	0.265
Surgery				0.339
Yes	50 (69.4)	33 (66.0)	17 (77.3)
No	22 (30.6)	17 (34.0)	5 (22.7)
Invasive Device
External ventricular drainage/Lumbar cistern drainage	41 (56.9)	25 (50.0)	16 (72.7)	0.073
Catheter	57 (79.2)	37 (74.0)	20 (90.9)	0.189
CSF data
ADA level (U/L)	15.50 (4.33-30.95)	14.00 (3.30-28.25)	19.55 (5.48-37.48)	0.131
Glucose level (mmol/L)	1.71 (0.21-2.98)	2.29 (1.35-3.46)	0.35 (0.05-0.91)	＜0.001
Chlorine level (mmol/L)	116.68±9.27	117.16±8.67	115.58±10.63	0.508
Protein level (g/L)	2.37 (1.12-4.01)	1.67 (0.84-2.78)	4.00 (2.98-4.54)	＜0.001
Leukocyte count (×106/L)	340.0 (52.5-2400.0)	188.0 (27.5-927.5)	1125.0 (102.5-4185.0)	0.029
Erythrocyte count (×106/L)	395.0 (10.0-4787.5)	395.0 (7.5-1987.5)	810.0 (65.0-10675.0)	0.306
Blood data
White blood cell level (×109/L)	13.13±6.11	12.42±5.64	14.75±6.94	0.138
Neutrophils level (×109/L)	10.55 (6.94-13.48)	10.13 (6.58-12.68)	12.56 (8.68-14.85)	0.071
Percentage of neutrophils	85.21 (78.86-88.05)	84.35 (76.36-87.49)	87.14 (83.40-88.88)	0.039
Liver function
ALT (U/L)	22.80 (14.63-57.93)	20.80 (14.08-46.35)	36.60 (19.40-125.15)	0.018
AST (U/L)	22.60 (17.03-39.45)	20.05 (15.53-38.03)	31.80(19.25-66.28)	0.014
TBIL (mmol/L)	14.65 (10.13-18.60)	13.90 (9.40-18.30)	15.05 (12.88-21.48)	0.167
ALP (U/L)	89.5 (72.0-127.0)	82.0 (70.5-118.0)	104.0 (77.8-170.5)	0.069
Total protein (g/L)	63.22±8.06	64.30±8.04	60.76±7.73	0.086
Albumin (g/L)	35.93±6.62	37.75±5.51	31.79±7.15	＜0.001
Renal function
Urea nitrogen (mmol/L)	5.05 (3.58-6.95)	4.72 (2.98-6.58)	6.13 (4.63-8.60)	0.02
Creatinine (mmol/L)	61.53±25.25	61.27±27.27	62.14±20.51	0.893
